1 **Dispersal limitation and thermodynamic constraints govern spatial structure**  
2 **of permafrost microbial communities**

3

4 Eric M. Bottos<sup>1,2\*</sup>, David W. Kennedy<sup>1</sup>, Elvira B. Romero<sup>1</sup>, Sarah J. Fansler<sup>1</sup>, Joseph M.  
5 Brown<sup>3</sup>, Lisa M. Bramer<sup>4</sup>, Rosalie K. Chu<sup>5</sup>, Malak M. Tfaily<sup>5</sup>, Janet K., Jansson<sup>1</sup>, and  
6 James C. Stegen<sup>1</sup>.

7

8 <sup>1</sup> Earth and Biological Sciences Directorate, Pacific Northwest National Laboratory,  
9 Richland, WA, USA

10 <sup>2</sup> Department of Biological Sciences, Thompson Rivers University, Kamloops, BC,  
11 Canada

12 <sup>3</sup> Computational Biology, Pacific Northwest National Laboratory, Richland, WA, USA

13 <sup>4</sup> National Security Directorate, Pacific Northwest National Laboratory, Richland, WA,  
14 USA

15 <sup>5</sup> Environmental Molecular Sciences Laboratory, Pacific Northwest National Laboratory,  
16 Richland, WA, USA

17

18 **\*Corresponding Author:**

19 Eric M. Bottos

20 Email: ebottos@tru.ca

21 Thompson Rivers University

22 Box 3010, 900 McGill Rd

23 Kamloops, BC, V2C 0C8

## 24 **Abstract**

25           Understanding drivers of permafrost microbial community composition is  
26 critical for understanding permafrost microbiology and predicting ecosystem  
27 responses to thaw, however studies describing ecological controls on these  
28 communities are lacking. We hypothesize that permafrost communities are uniquely  
29 shaped by constraints imposed by prolonged freezing, and decoupled from factors  
30 that influence non-permafrost soil communities. To test this hypothesis, we  
31 characterized patterns of environmental variation and microbial community  
32 composition in permafrost across an Alaskan boreal forest landscape. We used null  
33 modeling to estimate the relative importance of selective and neutral assembly  
34 processes on community composition, and identified environmental factors  
35 influencing ecological selection through regression and structural equation  
36 modeling (SEM). Proportionally, the strongest process influencing community  
37 composition was dispersal limitation (0.36), exceeding the influence of homogenous  
38 selection (0.21), variable selection (0.16), and homogenizing dispersal (0.05). Fe(II)  
39 content was the most important factor explaining variable selection, and was  
40 significantly associated with total selection by univariate regression ( $R^2=0.14$ ,  
41  $p=0.003$ ). SEM supported a model in which Fe(II) content mediated influences of the  
42 Gibbs free energy of the organic matter pool and organic acid concentration on total  
43 selection. These findings reveal that the processes shaping microbial communities  
44 in permafrost are distinct from those in non-permafrost soils, as the stability of the  
45 permafrost environment imposes dispersal and thermodynamic constraints on  
46 permafrost communities. Models of permafrost community composition will need to

47 account for these unique drivers in order to predict community characteristics  
48 across permafrost landscapes, and in efforts to understand how pre-thaw conditions  
49 will influence post-thaw ecological and biogeochemical processes.

50

## 51 **Introduction**

52 Permafrost is defined as ground that has remained below 0 °C for two or  
53 more consecutive years <sup>1</sup>. Because this definition is solely based on a condition of  
54 'ground climate' <sup>2</sup>, permafrost-affected soils can span a diverse range of soil types  
55 and be highly varied in geography, geology, physicochemistry, and microbiology.  
56 Indeed, permafrost environments account for approximately 16 % of Earth's soil  
57 environments <sup>3</sup>, spanning much of the terrestrial Arctic and subarctic <sup>4</sup>, ice-free  
58 areas of Antarctica <sup>5</sup>, and high-elevation regions in both the northern and southern  
59 hemispheres <sup>4,6</sup>. Collectively, these soils represent an important microbial  
60 ecosystem <sup>7</sup> and a globally significant pool of sequestered carbon <sup>3,8</sup>, which is being  
61 mobilized as climate warming increases permafrost thaw <sup>9</sup>. While the fate of this  
62 carbon remains uncertain, it will likely be strongly dependent on properties of the  
63 resident microbial communities and the local soil conditions. As such, it is important  
64 to understand the natural abiotic and biotic variation that occurs within permafrost  
65 environments in order to accurately inform models aimed at predicting responses  
66 to change across these regions.

67 While both environmental conditions and microbial community composition  
68 of permafrost-affected soils are known to be highly variable, the degree to which  
69 variation in community composition is linked to physicochemical conditions of the  
70 soil is not well understood <sup>10</sup>. In many non-permafrost soils, microbial community  
71 composition is shaped by physicochemical conditions, including pH <sup>11-13</sup>, nutrient  
72 content <sup>14,15</sup>, and soil moisture <sup>16-18</sup>. Given that permafrost can support active  
73 microbial communities <sup>19,20</sup>, it is reasonable to assume that similar factors may be

74 important in structuring the permafrost microbiome. Alternatively, microbial  
75 community composition in these environments may be decoupled from  
76 physicochemical conditions that are found to be important in non-permafrost soils,  
77 and may instead be similarly shaped by the shared constraints imposed by  
78 prolonged freezing. Understanding how microbial communities are shaped by  
79 environmental conditions represents an important knowledge gap in permafrost  
80 microbiology.

81 While resolving drivers of community composition in permafrost  
82 environments will improve fundamental understanding of the microbiology of these  
83 extreme ecosystems, there is also practical importance in resolving how pre-thaw  
84 conditions may be used as predictors of system level response to thaw. Earth system  
85 models that integrate aspects of microbial community composition and function are  
86 gaining support to improve understanding of terrestrial carbon cycling and  
87 predictions about the fate of soil carbon in response to environmental change <sup>21,22</sup>.  
88 However, permafrost environments bring a high level of complexity that is difficult  
89 to generalize in current models, because soil type, soil conditions, and carbon  
90 composition may all have important impacts on post thaw dynamics and carbon  
91 transformation <sup>23-26</sup>. Additionally, the composition of pre-thaw communities may be  
92 a strong determinant of post-thaw processes, as permafrost microbial communities  
93 are expected to respond rapidly to thaw <sup>27,28</sup>, and the abundance of particular taxa  
94 and functional genes can be important predictors of process rates, such as  
95 methanogenesis <sup>26,29,30</sup> and iron reduction <sup>31</sup>. These findings underscore the  
96 importance of integrating knowledge of the physical environment, the chemical

97 nature of the organic matter pool, and the structure and function of permafrost  
98 microbial communities to accurately predict rates of carbon metabolism in these  
99 systems. Spatially explicit studies capturing measures of soil heterogeneity are,  
100 therefore, necessary to inform models aimed at predicting microbial community  
101 responses to permafrost thaw and carbon fate in these environments.

102         The purpose of this work was to resolve the factors and processes that  
103 govern microbial community structure in permafrost-affected soils. We hypothesize  
104 that the factors and processes shaping permafrost microbial communities differ  
105 from those shaping non-permafrost soil communities, and reflect the unique  
106 constraints of the permafrost environment. We characterized patterns of microbial  
107 community composition along landscape gradients in the boreal forest ecosystem of  
108 the Caribou Poker Creek Research Watershed (CPCRW) near Fairbanks, AK. We  
109 examined the influence of dispersal and selection on patterns of community  
110 composition and evaluated the importance of permafrost physicochemical  
111 conditions, including soil organic matter composition and thermodynamic  
112 properties, as deterministic factors. As the first landscape-scale survey linking  
113 permafrost community composition to environmental variability, this work  
114 provides mechanistic understanding of the controls on permafrost communities.  
115 This understanding can, in turn, inform models aimed at predicting permafrost  
116 microbial community characteristics and responses to thaw.

117

## 118 **Materials and Methods**

119 *Sample collection and processing*

120 Samples were collected along a hydrologic gradient in the Caribou Poker  
121 Creek Research Watershed (CPCRW). CPCRW is a long-term ecological research  
122 (LTER) site and is representative of the discontinuous permafrost regions of interior  
123 Alaska (<http://www.lter.uaf.edu/research/study-sites-cpcrw>). The sampling site  
124 was located on a gentle southeast-facing slope. To efficiently capture spatial  
125 variation at the landscape scale, we used a cyclic sampling design, as opposed to  
126 regular grid spacing <sup>32</sup>. A 3/5 cyclic sampling design with 4 m grid cells was  
127 employed along four replicate transects for 104 m: starting at the lowest elevation,  
128 transects were sampled at 0, 4, 12, 20, 24, 32, 40, 44, 52, 60, 64, 72, 80, 84, 92, 100,  
129 and 104 m. Four replicate transects ran parallel to each other based on a 2/3 cyclic  
130 sampling design with 10 m grid cells for 40 m (Figure 1).

131 At each sampling position, permafrost cores were collected using a SIPRE  
132 coring auger (John's Machine Shop, Fairbanks, AK). Samples were wrapped in  
133 aluminum foil and packed in coolers on dry ice until they could be stored at -20 °C at  
134 the University of Alaska, Fairbanks, AK. Samples were shipped on dry ice to Pacific  
135 Northwest National Laboratory in Richland, WA, where they were stored at -20 °C  
136 until further processing.

137 The top 3-12 cm of each core was removed using an ethanol sterilized chisel  
138 and the next 4-10 cm section of each core was taken for analysis. The exterior of  
139 each core section was removed using sterile razor blades, starting from a pristine  
140 surface of the core. Decontaminated cores were crushed and homogenized while  
141 frozen using a sterile stainless steel soil press in a walk-in -20 °C freezer.  
142 Homogenized frozen samples were partitioned aseptically for downstream analyses.

143 Samples to be stored anaerobically were immediately purged with nitrogen gas in  
144 60 ml serum bottles sealed with butyl rubber stoppers, and all partitioned material  
145 was stored at -20 °C until analysis. A total of 59 samples were included in the final  
146 analyses, as cores could not be retrieved from some sample locations or were  
147 compromised during sample processing (refer to Figure 1).

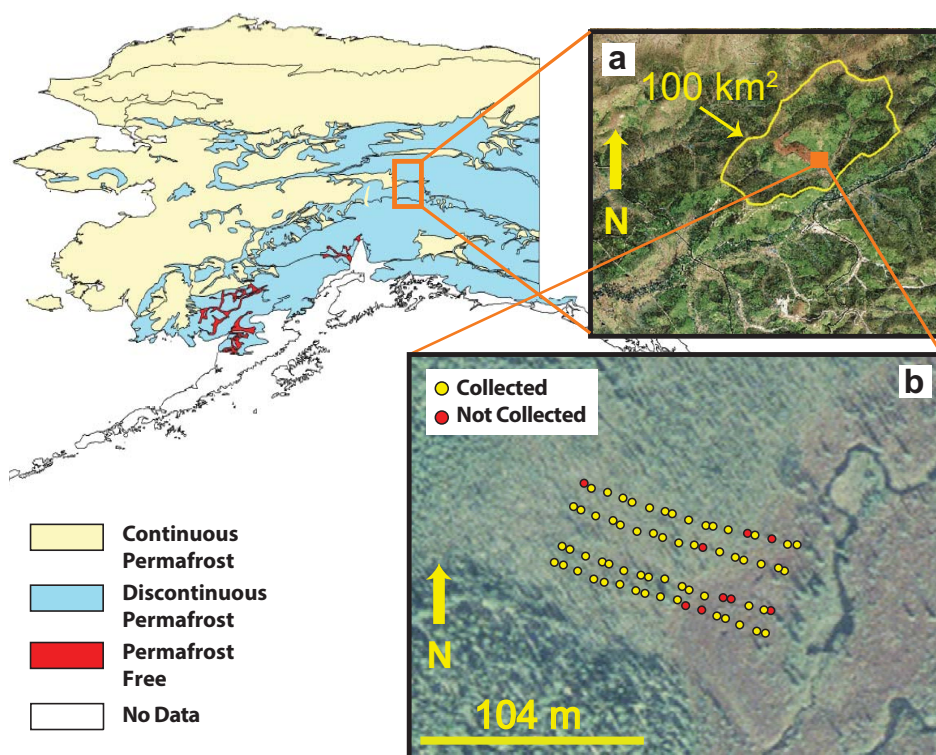

148

149 **Figure 1:** Map of Alaska indicating the location of a) the Caribou Poker Creek  
150 Research Watershed (CPCRW) and b) the location of the sample sites along each  
151 transect. Yellow dots indicate where samples were taken and included in the final  
152 analysis, while red dots indicate landscape positions where samples could not be  
153 recovered or where samples were compromised during processing, such that they  
154 were excluded from the final analysis.

155



156

157 *Physicochemical analyses*

158           Soil water content was determined by drying 1-10 g of sample at 105 °C, and  
159 measuring mass loss after 48 hours: sample masses were determined after 24 and  
160 48 h to ensure samples reached a constant mass in consecutive measurements.  
161 Water content was determined from the average of five replicate measurements per  
162 sample.

163           Total carbon and nitrogen content was determined from 30 mg freeze-dried,  
164 ground, and <2 mm sieved samples. Samples were analyzed on an Elementar vario  
165 El cube (Elementar, Germany). Values were determined from the average of  
166 triplicate measurements for each sample.

167           Samples for metals and anion analyses were prepared from freeze-dried,  
168 ground, and <2 mm sieved samples. For metals analysis, 1 g of sample was extracted  
169 with 10 ml of 0.5 N HCl shaking at 200 rpm for 2 h at room temperature. Anion  
170 extractions were completed as above, with 1 g of soil in 5-10 ml of deionized water.  
171 Metals (Fe, Mn, Mg, Cu, P, S) and anion (Cl<sup>-</sup>, SO<sub>4</sub><sup>-</sup>, and NO<sub>3</sub><sup>-</sup>) analyses were completed  
172 as previously described (Zachara et al., 2009).

173           Iron(II) content was determined by ferrozine assay <sup>33</sup>. In an anaerobic  
174 chamber (Coy Laboratory Products, Grass Valley, MI), 10 ml 0.5 N HCl was added to  
175 1 g of permafrost sample, and the vial was sealed and vortexed. Samples were  
176 extracted for 1 h and filtered through a 0.22 µm pore-size polyethersulfone (PES)  
177 syringe filter. Extracts were diluted in 0.1 N HCl and 100 µl was added to 1 ml  
178 ferrozine; after 5 min, the absorbance at 562 nm was measured on a Shimadzu

179 Biospec-1601 spectrophotometer. Iron(II) concentrations were determined from a  
180 six-point standard curve ranging from 0 to 45  $\mu\text{M}$  Iron(II). Samples were dried at 60  
181  $^{\circ}\text{C}$  and weighed to determine the Iron(II) content by dry weight.

182 Organic acids and sugars were quantified in the same water extracts  
183 prepared for anion analysis, using an Agilent 1100 series HPLC (Agilent, Palo Alto,  
184 CA) with a 300 x 7.8mm Aminex HPX-87H column (Bio-Rad, Hercules, CA), a 0.008 N  
185  $\text{H}_2\text{SO}_4$  mobile phase with a flow rate of 0.6 ml/min and variable wavelength detector  
186 (VWD) at 210 nm for organic acids and refraction index detector (RID) for sugars.  
187 Samples were filtered through a 0.22  $\mu\text{m}$  pore-size PES syringe filter and acidified  
188 by adding 10  $\mu\text{l}$  of 2.5 N  $\text{H}_2\text{SO}_4$  per ml. Concentrations were determined by  
189 comparison to peak areas of standards.

190 Soil texture was determined by measuring the gravel (> 2mm), sand (64  $\mu\text{m}$ -  
191 2 mm), and mud (silt and clay) (<64  $\mu\text{m}$ ) fractions of each sample. Briefly, 20 g of  
192 soil was dried at 60  $^{\circ}\text{C}$ , and the total dry weight determined. Samples were dry  
193 sieved through a 2 mm sieve, and the mass of the >2 mm fraction was used to  
194 calculate the gravel fraction. The <2 mm fraction was wet sieved through a 64  $\mu\text{m}$   
195 sieve, the fraction retained was dried and used to calculate the sand fraction, while  
196 the <64  $\mu\text{m}$  fraction was dried and used to calculate the mud fraction.

197 Soil pH was determined on a Denver Instrument model 215 pH meter  
198 (Denver Instruments, Bohemia, NY) by slurry of 1 g soil in 2 ml MilliQ water  
199 (Millipore Sigma, St. Louis, MO).

200

201 *Organic matter composition determination by FT-ICR-MS*

202           Organic matter was extracted from bulk soil sequentially with water,  
203 methanol and chloroform as described previously<sup>34,35</sup>. Briefly, organic matter  
204 extracts were prepared by adding 1 ml of solvent to 100 mg lyophilized and ground  
205 bulk soil and shaking for two hours on an Eppendorf Thermomixer in 2 mL capped  
206 glass vials. Samples were removed from the shaker and left to stand before  
207 centrifugation at 2000 rpm for 10 min and the supernatant was retained for  
208 analysis. The soil residue was dried with nitrogen gas to remove any residual  
209 solvent, and the extraction was repeated with each of the next two solvents. The  
210 chloroform and water extracts were diluted in methanol to improve electrospray  
211 ionization (ESI) efficiency and 20  $\mu$ l was injected into the FTICR-MS. Samples were  
212 analyzed in triplicate for water extractions and chloroform extractions, and singly  
213 for methanol extractions.

214           A 12 Tesla Bruker Solarix FTICR-MS located at the Environmental Molecular  
215 Sciences Laboratory (EMSL) in Richland, WA, was used to collect high-resolution  
216 mass spectra of the organic matter in the extracts. A standard Bruker ESI source was  
217 used to generate negatively charged molecular ions. Samples were introduced  
218 directly to the ESI source at a flow rate of 3  $\mu$ l/min. The ion accumulation time was  
219 varied, from 0.1 s to 0.5 s, to account for differences in C concentration between  
220 samples and to maintain a final dissolved organic carbon concentration of 20 ppm.  
221 The instrument was externally calibrated weekly with a tuning solution from  
222 Agilent (Santa Clara, CA), which calibrates to a mass accuracy of <0.1 ppm. Two  
223 hundred scans were averaged for each sample and internally calibrated using OM  
224 homologous series separated by 14 Da ( $-\text{CH}_2$  groups). The mass measurement

225 accuracy was less than 1 ppm for singly charged ions across a broad  $m/z$  range (i.e.  
226  $200 < m/z < 1200$ ). To further reduce cumulative errors, all sample peak lists for the  
227 entire dataset were aligned to each other prior to formula assignment to eliminate  
228 possible mass shifts that would impact formula assignment. Putative chemical  
229 formulas were assigned using in-house software based on the Compound  
230 Identification Algorithm (CIA) <sup>36</sup>, and modified as previously described <sup>37</sup>. Chemical  
231 formulas were assigned based on the following criteria:  $S/N > 7$ , and mass  
232 measurement error  $< 1$  ppm, taking into consideration the presence of C, H, O, N, S  
233 and P and excluding other elements. Peaks with large mass ratios ( $m/z$  values  $> 500$   
234 Da) were assigned formulas through the detection of homologous series ( $CH_2$ , O,  
235  $H_2$ ). Additionally, to ensure consistent assignment of molecular formula the  
236 following rules were implemented: one phosphorus requires at least four oxygens in  
237 a formula and when multiple formula candidates were assigned the formula with  
238 the lowest error and with the lowest number of heteroatoms was picked.

239 For all analyses, peak intensities were converted to presence/absence and  
240 peaks observed in any of the triplicate measurements were included as present.  
241 Compound classes were assigned to chemical formulas based on molar O:C and H:C  
242 ratios, determined from analysis of van Krevelen diagrams. The Gibbs energies of  
243 the oxidation half reaction ( $\Delta G^\circ_{Cox}$ ) of each compound was derived based on the  
244 nominal oxidation state of carbon (NOSC) as previously described <sup>38</sup>. The average  
245  $\Delta G^\circ_{Cox}$  of the carbon pool was determined for each sample extraction: the median  
246 values were used for the methanol ( $\Delta G^\circ_{Cox}(\text{MeOH})$ ) and chloroform ( $\Delta G^\circ_{Cox}(\text{CHCl}_3)$ )

247 extracts due to highly skewed distributions, while the  $\Delta G^{\circ}_{\text{Cox}}$  was normally  
248 distributed for water extracts ( $\Delta G^{\circ}_{\text{Cox}}(\text{H}_2\text{O})$ ) such that the mean values were used.

249

### 250 *Microbial community analyses*

251 Total community DNA was extracted from 0.25 g of each sample using the  
252 MoBio Power Soil DNA Isolation Kit (MoBio Laboratories, Carlsbad, CA), according  
253 to manufacturer's instructions. Additional cleanup and concentration of DNA  
254 extracts was completed using the Zymo ZR-96 Genomic DNA Clean and  
255 Concentrator-5 kit (Zymo Research Corporation, Irvine, CA). PCR amplification of  
256 the V4 region of the 16S rRNA gene was performed as previously described <sup>39</sup>, with  
257 the exception that the twelve-base barcode sequence was included in the forward  
258 primer. Amplicons were sequenced on an Illumina MiSeq using the 500 cycle Miseq  
259 Reagent Kit v2 (Illumina Inc., San Diego, CA), according to manufacturer's  
260 instructions.

261 Raw sequence reads were demultiplexed using EA-Utills <sup>40</sup> not allowing any  
262 mismatches in the barcode sequence. Reads were quality filtered with BBDuk2 <sup>41</sup> to  
263 remove adapter sequences and PhiX with matching kmer length of 31 bp at a  
264 hamming distance of 1. Reads shorter than 51 bp were discarded. Reads were  
265 merged using USEARCH <sup>42</sup> with a minimum length threshold of 175 bp and  
266 maximum error rate of 1 %. Sequences were de-replicated and clustered using the  
267 distance-based, greedy clustering method of USEARCH at 97 % pairwise sequence  
268 identity among operational taxonomic unit (OTU) member sequences. Taxonomy  
269 was assigned to OTU sequences at a minimum identity cutoff fraction of 0.8 using

270 the global alignment method implemented in USEARCH across RDP trainset version  
271 15. OTU seed sequences were filtered against RDP classifier training database  
272 version 9 to identify chimeric OTUs using USEARCH. De novo prediction of chimeric  
273 reads occurred as reads were assigned to OTUs. OTU count tables were randomly  
274 resampled to 17899 sequences and OTUs that could not be assigned at the kingdom  
275 level were removed.

276

### 277 *Statistical analysis*

278 The environmental variables consisted of all physicochemical variables and  
279 the average  $\Delta G^{\circ}_{Cox}$  for each FTICR extraction (mean for  $\Delta G^{\circ}_{Cox}(H_2O)$  and median for  
280  $\Delta G^{\circ}_{Cox}(MeOH)$  and  $\Delta G^{\circ}_{Cox}(CHCl_3)$ ). Missing data were replaced by the geometric  
281 mean of values for a given variable, or the arithmetic mean in the case of the lactate  
282 data, which had numerous zero values. Data for water content, Cl,  $SO_4$ ,  $NO_3$ ,  
283 Fe(total), Mn, Mg, Cu, P, S, Fe(II), C, and N were  $\log_{10}(x)$  transformed, and data for  
284 lactate, formate, and acetate concentrations were  $\log_{10}(x+1)$  transformed. Data for  
285 pH, gravel, sand, mud,  $\Delta G^{\circ}_{Cox}(H_2O)$ ,  $\Delta G^{\circ}_{Cox}(CHCl_3)$ , and  $\Delta G^{\circ}_{Cox}(MeOH)$  were not  
286 transformed.

287 Principal components analysis (PCA) was used to assess variation in  
288 environmental variables across the landscape using the *princomp* function in R <sup>43</sup>.  
289 All variables were scaled by subtracting the mean and dividing by the standard  
290 deviation prior to analysis. Scores of all principal components (PCs) and variable  
291 loadings along each PC were extracted for downstream analyses. Variable loadings  
292 along each PC were used to assess the importance of individual variables to each PC.

293           Analyses of community diversity and composition were completed using the  
294 '*vegan*' package <sup>44</sup> in R. Shannon diversity estimates were completed based on the  
295 resampled OTU counts. OTU abundances were Hellinger transformed prior to all  
296 other compositional analyses. Non-metric multidimensional scaling was used to  
297 examine the community variation between samples based on Bray Curtis  
298 dissimilarity, and environmental variables were fit as vectors in the final two-  
299 dimensional ordination to evaluate relationships between community and  
300 environmental variation.

301           Spatial analyses were completed in R. Kriging was used to interpolate and  
302 visualize spatial trends in both the environmental and biological data, using the  
303 autokrig function of the '*automap*' package <sup>45</sup>. Principal coordinates of neighbor  
304 matrices (PCNM) was used to create orthogonal spatial variables based on sample  
305 site locations <sup>46,47</sup>. PCNMs were calculated as previously described <sup>48</sup>. PCNM axes  
306 were used as explanatory variables in downstream analyses to examine the  
307 importance of spatial filters on community composition.

308           A redundancy analysis (RDA) model was used to relate community  
309 composition to environmental and spatial variation using the *vegan* package <sup>44</sup> in R.  
310 Due to collinearity between several environmental variables, PC scores extracted  
311 from the environmental PCA were used to represent environmental variables in the  
312 model. Forward stepwise model building based on adjusted R<sup>2</sup> was carried out using  
313 all 23 PCs and all 15 positive PCNMs. The importance of each variable added to the  
314 model was assessed using variance partitioning based on RDA.

315 Null modeling was used to estimate the influence of ecological processes on  
316 community composition, as described previously<sup>49,50</sup>. The influence of selection was  
317 estimated by evaluating the difference between the observed between-community  
318 mean-nearest-taxon distance ( $\beta$ MNTD) and the mean of the null distribution in units  
319 of standard deviation. Significant deviations from the null distribution were  
320 evaluated using the  $\beta$ -nearest taxon index ( $\beta$ NTI) and the signal for selection was  
321 expressed as the proportion of comparisons for which  $\beta$ NTI>2 or  $\beta$ NTI<-2,  
322 representing signals for variable selection and homogenous selection, respectively.  
323 Comparisons falling within the null distribution ( $2 > \beta$ NTI > -2) represent  
324 compositional differences that do not arise from selection, and are instead  
325 attributable to dispersal limitation, homogenizing dispersal, or processes  
326 undominated by dispersal or selection. To assess the relative influence of these  
327 processes, a Raup-Crick metric incorporating species relative abundance ( $RC_{\text{bray}}$ )  
328 was used to compare the observed and expected species turnover between  
329 communities. Significant deviations from the null distribution indicating greater  
330 than expected differences in community composition ( $2 > \beta$ NTI > -2 and  $RC_{\text{bray}} > 0.95$ )  
331 were attributed to dispersal limitation, while those indicating less than expected  
332 differences in community composition ( $2 > \beta$ NTI > -2 and  $RC_{\text{bray}} < -0.95$ ) were  
333 attributed to homogenizing dispersal. Comparisons falling within the null  
334 distribution of both metrics ( $2 > \beta$ NTI > -2 and  $0.95 > RC_{\text{bray}} > -0.95$ ) represent  
335 differences in community composition that were not strongly governed by selection  
336 or dispersal (i.e., the observed differences were ‘undominated’).



337 A regression modelling approach was used to identify the environmental  
338 variables that explain variation in the process estimates for total selection (variable  
339 and homogenous selection combined). Here, process estimates were generated for  
340 each community by finding the fraction of pairwise comparisons—between a given  
341 community and all other communities—falling into the process categories  
342 summarized above <sup>50</sup>. Community-level estimates of total selection were then used  
343 as the dependent variable in an exhaustive model selection using Bayesian  
344 information criterion (BIC), performed in the ‘*leaps*’ package <sup>51</sup> in R.

345 Path analysis was used to estimate interactions among environmental  
346 variables predicted to influence total selection. A hypothetical model outlining  
347 expected relationships between variables was evaluated using the *sem* function of  
348 the ‘*sem*’ package <sup>52</sup> in R (Figure S1). Adjustments to the model were informed by  
349 modification indices, which suggest addition of paths to improve model fit, and were  
350 included based on logical evaluation of potential associations between variables.

351

#### 352 *Code availability*

353 Custom computer code used in the current study is available from the  
354 corresponding author on reasonable request.

355

#### 356 *Data availability*

357 Sequence data has been deposited in the European Nucleotide Archive (ENA), under  
358 accession number PRJEB23054

359 (<http://www.ebi.ac.uk/ena/data/view/PRJEB23054>). All other datasets generated

360 and analyzed in the current study are available from the corresponding author on  
361 reasonable request.

362

## 363 **Results**

### 364 *Environmental conditions and carbon composition*

365 Permafrost characteristics were highly variable across the sampling area,  
366 and are summarized in Table S1. Samples ranged greatly in carbon content from 1.3  
367 to 35.8 %, and nitrogen content co-varied strongly with carbon content ( $r^2=0.98$ ),  
368 ranging from 0.1 to 2.0 %. Soil texture was typically dominated by sand (average 63  
369 %), but had substantial inputs of mud (average 35 %). All samples were mildly  
370 acidic, ranging from pH 4.9 to 6.7. Notably, permafrost samples across the site  
371 varied greatly in ice content, with gravimetric water content varying from 0.28 to  
372 9.2 g(water)/g(dry soil). Fe(II) content, indicative of soil redox conditions, was also  
373 highly variable, spanning over two orders of magnitude from 0.07 to 12.9 mg/g(dry  
374 soil).

375 The compound classes assigned to FTICR peaks based on van Krevelen  
376 diagrams showed distinct peak profiles for each solvent extraction (Table S2).  
377 Water extractions recovered the highest percentage of compounds classified as  
378 lignin-, condensed hydrocarbon-, carbohydrate-, tannin-, and amino sugar- like  
379 compounds, while methanol and chloroform extractions recovered the highest  
380 percentage of compounds grouping to unsaturated hydrocarbon- and lipid- like  
381 compounds. Compounds grouping as peptide- or protein- like were recovered in all  
382 fractions, representing 6.61 %, 8.93 %, and 4.96 % in the water, methanol, and

383 chloroform extracts, respectively. A large percentage of compounds in each  
384 extraction were not assigned to a compound class (25-48 %). The  $\Delta G^{\circ}_{Cox}$  estimates  
385 from the FTICR profiles were tightly linked to the overall variation in FTICR  
386 compound classes for each extraction (Figure S2). The  $\Delta G^{\circ}_{Cox}$  estimates were,  
387 therefore, used to represent organic carbon profiles in downstream analyses, as  
388 they capture variation in organic carbon composition as a biochemically meaningful  
389 continuous variable that can be interpreted mechanistically.

390         PCA using all physicochemical variables revealed environmental gradients  
391 both within and between transects (Figure 2). The first two PCs accounted for  
392 nearly 58 % of the environmental variance, with 41 % captured on PC1 and 17 % on  
393 PC2. The strongest loadings along PC1 were for C content (-0.31), N content (-0.31),  
394 water content (-0.28), S content (-0.28), acetate (-0.28),  $\Delta G^{\circ}_{Cox}(H_2O)$  (-0.27), and  
395 formate (-0.27), while the strongest loadings along PC2 were for Fe(II) content (-  
396 0.37), soil texture fractions of mud (-0.37) and sand (0.35), pH (0.33), and P content  
397 (-0.33).

398

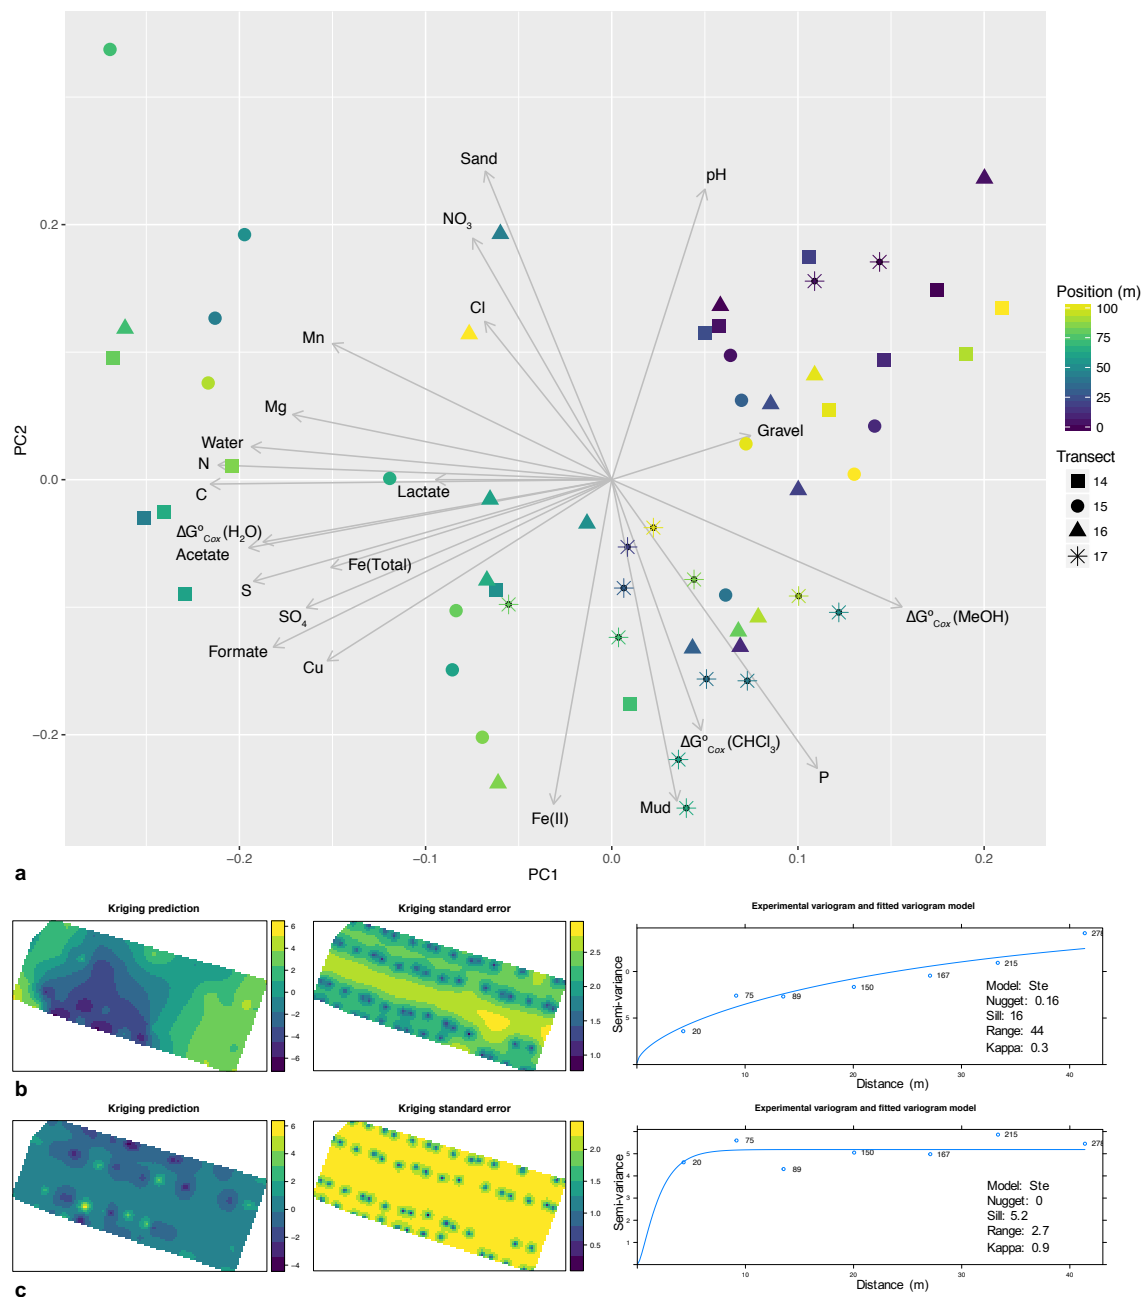

399

400 Figure 2: a) Principal components analysis (PCA) representing environmental  
401 variation between samples, and Kriging predictions of spatial patterns of  
402 environmental variation based on b) PC1 and c) PC2 scores across the sampling area  
403 (n=59).

404

405 *Microbial community composition*

406 Bacterial sequences grouped to a total of 45 phyla or candidate phyla, and 11  
407 phyla were represented at >1 % of the total community (Figure S3). Based on the  
408 average number of sequences in each sample grouping to bacterial phyla,  
409 communities were dominated by Proteobacteria (23.9 %) (particularly Beta- (10.9  
410 %), Alpha-(5.9 %), Delta- (5.3 %), and Gamma- (1.5 %) proteobacteria),  
411 Acidobacteria (16.9 %), Verrucomicrobia (13.4 %), Actinobacteria (9.9 %),  
412 Chloroflexi (9.8 %), Bacteroidetes (8.5 %), Gemmatimonadetes (5.0 %),  
413 Planctomycetes (1.9 %), Nitrospirae (1.5 %), Parcubacteria (1.4 %), and Firmicutes  
414 (1.1 %). Bacterial sequences grouping to other phyla and bacterial sequences that  
415 could not be classified at the phylum level represented 4.8 % and 0.8 % of the total  
416 sequences, respectively.

417 Approximately 1.2 % of sequences were classified as Archaeal, with 79 % of  
418 these sequences grouping to the phylum Euryarchaeota. Sequences within the  
419 Euryarchaeota grouped predominantly within the Methanomicrobia and  
420 Methanobacteria.

421

422 *Patterns of community composition*

423 Community composition showed non-random spatial structure (Figure 3),  
424 and was explained by both environmental variables (PCs) and, to a lesser extent,  
425 spatial variables (PCNMs). Stepwise model selection supported a model with fifteen  
426 variables, which fit the data with an adjusted  $R^2=0.48$ ; however, variance

427 partitioning showed that many of these variables contributed only incrementally to  
428 improving model fit (Figure S4). A model incorporating the first two variables from  
429 the selected model (PC2, PC1) fit the data with an adjusted  $R^2=0.34$ , and subsequent  
430 addition of the remaining variables retained in the selected model improved the  
431 adjusted  $R^2$  by 0.02 (PCNM4) or less (all other variables) (Figure 4). We therefore  
432 focused our interpretation on the model including PC2, PC1, and PCNM4. The  
433 variable loadings on the PCs selected in the model indicated several environmental  
434 factors were related to community composition (see Figure 2 for relationships  
435 between environmental factors along PC1 and PC2).

436         Univariate regression of factors with the strongest loadings along PC1 and  
437 PC2 showed that alpha diversity and the relative abundances of particular taxa were  
438 significantly associated with one or more of these environmental variables (Table  
439 S3).

440

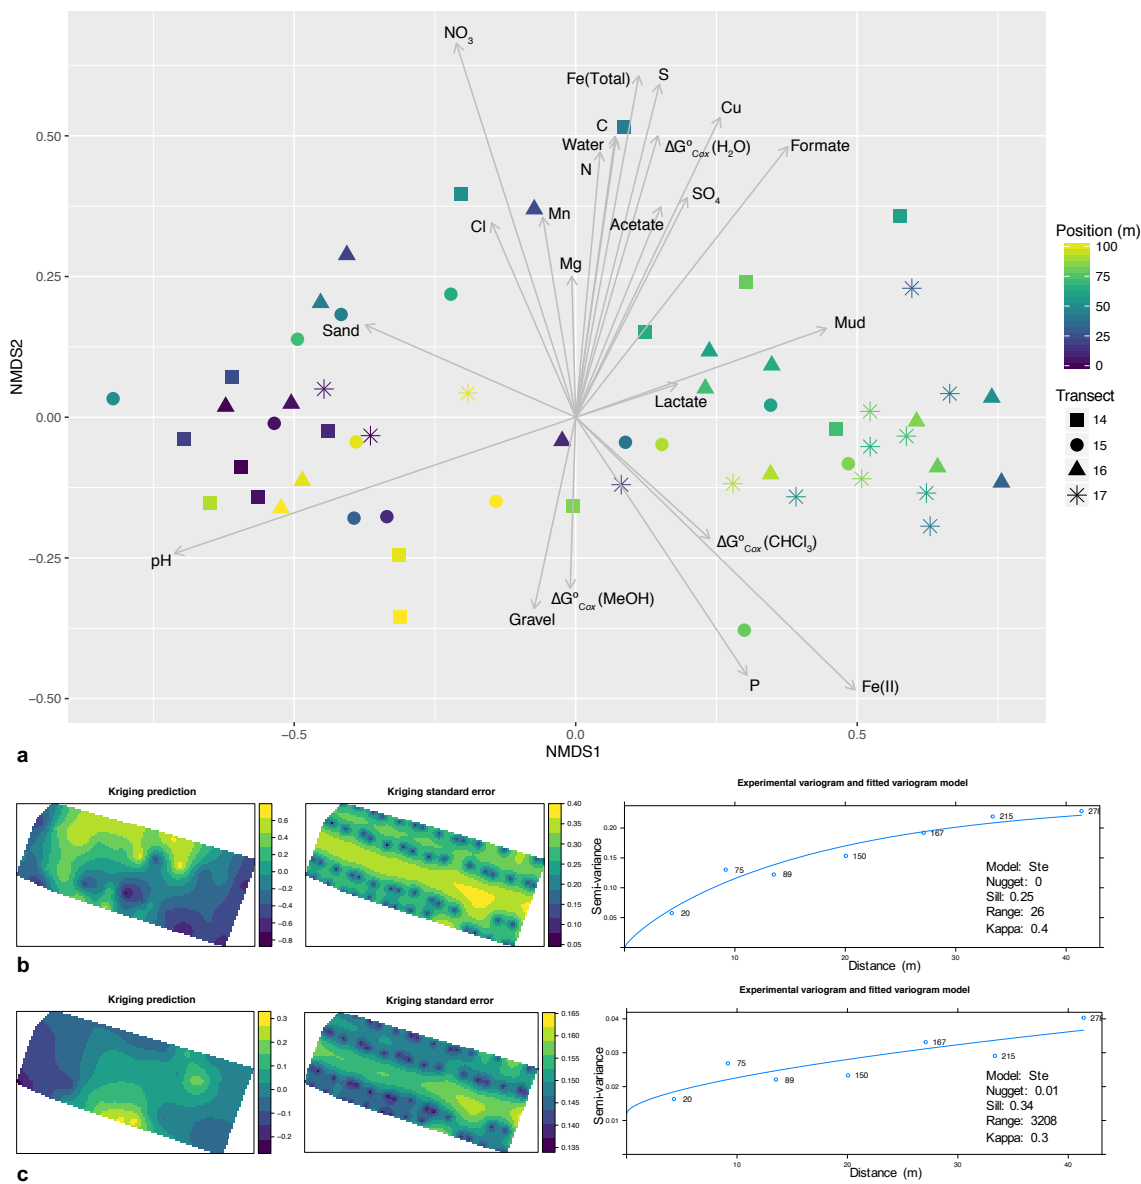

441

442 Figure 3: a) Non-metric multidimensional scaling (NMDS) plot representing the  
443 Bray-Curtis dissimilarity in microbial community composition between samples,  
444 with environmental vectors overlaid, and Kriging predictions of spatial patterns of  
445 community composition based on b) NMDS1 and c) NMDS2 scores across the  
446 sampling area (n=59).

447

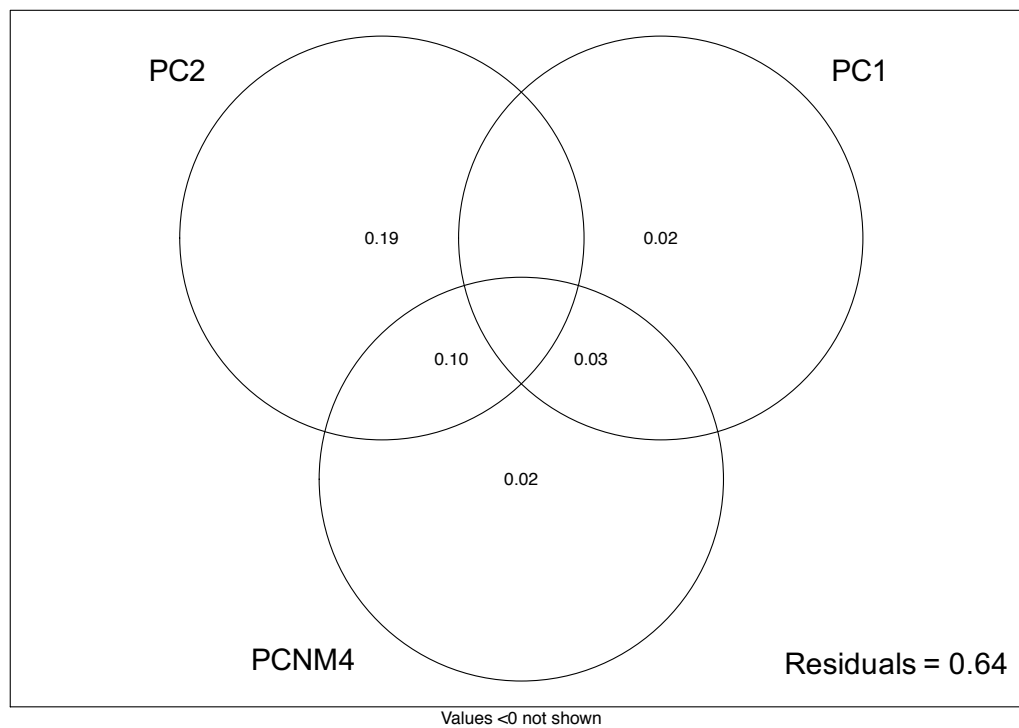

448

449 Figure 4: The proportion of variation in microbial community composition  
450 explained by the environmental and spatial variables selected in forward stepwise  
451 model building (n=59): including additional variables improved the adjusted R<sup>2</sup> of  
452 the model by <0.02.

453



454

455 *Null model analyses*

456 Null modeling revealed signals for variable selection ( $\beta\text{NTI}>2$ ), homogenous  
457 selection ( $\beta\text{NTI}<-2$ ), dispersal limitation ( $2>\beta\text{NTI}>-2$  and  $\text{RC}_{\text{bray}}>0.95$ ),  
458 homogenizing dispersal ( $2>\beta\text{NTI}>-2$  and  $\text{RC}_{\text{bray}}<-0.95$ ), and processes undominated  
459 by dispersal or selection ( $2>\beta\text{NTI}>-2$  and  $0.95>\text{RC}_{\text{bray}}>-0.95$ ) (Figure 5). Values  
460 from 0 to 1 indicating the relative influence of each process on the observed  
461 variation in community composition revealed the strongest signal was for dispersal  
462 limitation (0.36), and the lowest signal was for homogenizing dispersal (0.05). The  
463 signal for homogenous selection (0.21) was slightly higher than for variable  
464 selection (0.16), contributing to a signal of 0.37 for total selection. Variation not  
465 accounted for by dispersal or selection accounted for the remaining signal of 0.23.

466 Regression model selection indicated Fe(II) was the most important  
467 environmental variable influencing variable selection, and Fe(II) was significantly  
468 associated with the relative influence of total selection by univariate regression  
469 ( $R^2=0.14$ ,  $p=0.003$ ).

470

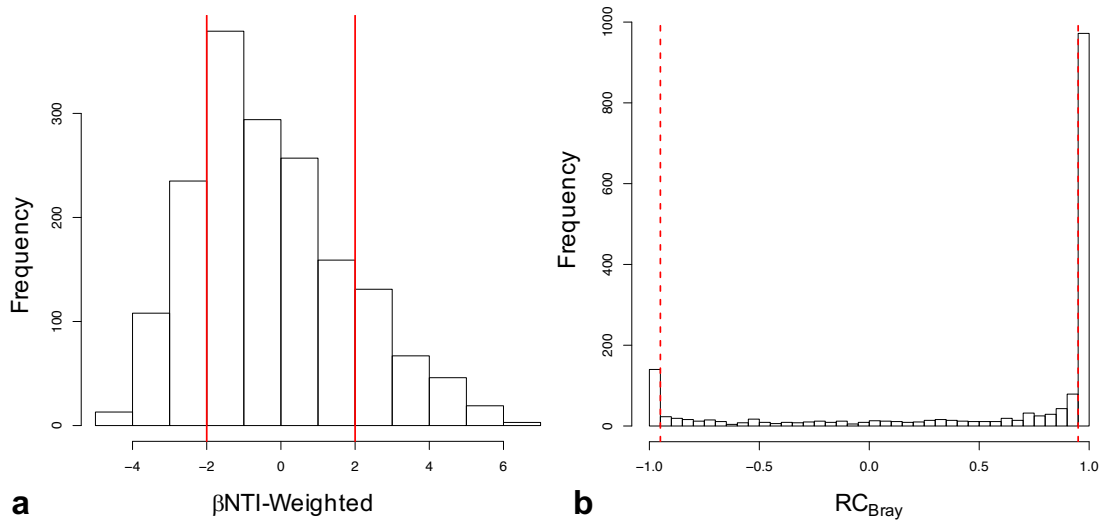

471

472 Figure 5: Histograms representing the observed distribution of comparisons based  
473 on a)  $\beta$ NTI and  $RC_{Bray}$ . Red lines represent the significance thresholds, whereby  
474 values outside their bounds are significantly different from the null distribution  
475 (n=59).

476

477

478 *Path analysis*

479         Given the relationship observed between Fe(II) and total selection, we  
480 proposed a path model in which variables that reflect energetic constraints on  
481 microbial activity may influence total selection indirectly, through relationships  
482 mediated by Fe(II) content (See Figure S1). Our initial model was not consistent  
483 with the data ( $X^2=37.2$ , d.f.=9  $p=2.4 \times 10^{-5}$ ), and was revised to better reflect  
484 relationships between the variables. All paths in the initial model were retained in  
485 the final model, and modification indices supported the addition of a path from soil  
486 carbon content to nitrate content. The final model did not differ significantly from  
487 the data ( $X^2=10.3$ , d.f.=8,  $p=0.25$ ) and explained 14.5 % of the variation in total  
488 selection and between 37 and 68 % of the variation in other endogenous variables  
489 (Figure 6). The direct effect of Fe(II) was the strongest total effect on total selection,  
490 while organic acid content had the strongest indirect effect on total selection (Table  
491 1).

492

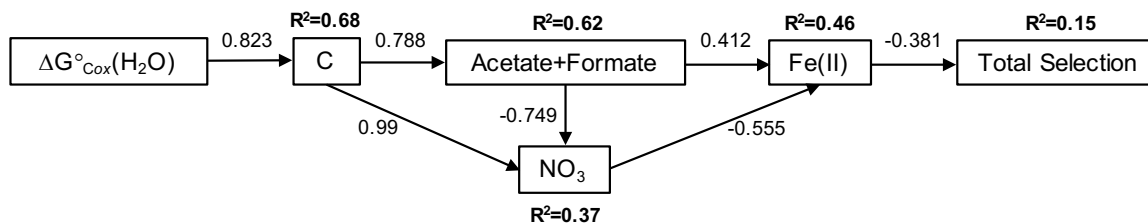

493

494 **Figure 6:** Final structural equation model ( $X^2=10.3$ , d.f.=8,  $p=0.25$ ) representing  
 495 relationships between variables hypothesized to deterministically influence  
 496 community composition ( $n=59$ ). Values alongside arrows represent standardized  
 497 path coefficients, and the variation explained for endogenous variables is indicated  
 498 above each variable. All paths are significant.

499

500 **Table 1:** Standardized direct effects, indirect effects, and total effects of  
 501 environmental factors on total selection.

|                              | Direct Effects | Indirect Effects | Total Effects |
|------------------------------|----------------|------------------|---------------|
| $\Delta G^\circ_{Cox}(H_2O)$ |                | -0.023           | -0.023        |
| Carbon                       |                | -0.039           | -0.039        |
| Acetate+Formate              |                | -0.315           | -0.315        |
| Nitrate                      |                | 0.211            | 0.211         |
| Fe(II)                       | -0.381         |                  | -0.381        |

502

503

## 504 **Discussion**

505       Previous studies have demonstrated that permafrost soils contain diverse  
506 and varied communities that are likely active *in situ*; however, studies of permafrost  
507 microbiology typically suffer from low sample sizes, limiting the ability to examine  
508 ecological relationships that may influence community structure and function. To  
509 address this knowledge gap, we characterized patterns of environmental variation  
510 and microbial community composition in a boreal forest ecosystem across  
511 landscape gradients. By employing a well-replicated and geostatistically-informed  
512 sampling design, we have provided the first characterization of ecological processes  
513 driving landscape scale spatial structure of permafrost microbial community  
514 composition. Through this work, we show that patterns of both environmental  
515 characteristics and microbial community composition can be highly variable over  
516 short distances and exhibit non-random spatial structure, with patterns of  
517 community composition driven by deterministic and neutral processes that arise  
518 primarily from the physical constraints of the permafrost environment.

519

### 520 *Spatial structure of permafrost physicochemistry*

521       The degree of heterogeneity in soil physicochemical and organic matter  
522 characteristics observed over the study area was striking, likely reflecting spatially  
523 structured variation in thaw history and organic matter deposition. We observed a  
524 non-linear spatial trend in environmental variation, with samples at the extreme  
525 ends of the transects found to be more similar to each other than to those in the

526 middle of the transects, most notably in terms of water content, pH, carbon and  
527 nitrogen content,  $\Delta G^{\circ}_{\text{Cox}}(\text{H}_2\text{O})$ , and organic acid content (acetate and formate).  
528 Higher water content, which was observed predominantly through the middle of the  
529 transects, may represent ice inclusions in the transition zone near the surface of the  
530 permafrost, formed during more recent thaw events <sup>53</sup>. Total carbon and nitrogen  
531 content,  $\Delta G^{\circ}_{\text{Cox}}(\text{H}_2\text{O})$ , and the abundance of organic acids were also highest through  
532 the middle of the transects, which may reflect more substantial deposition of  
533 undecomposed plant material from the active layer into the upper permafrost. The  
534 proportion of organic compounds grouping to lignins, carbohydrates, and amino  
535 sugars were highest in water extracts from the middle of the transects, and  
536 substantial deposits of fibric material were observed in many of these same  
537 samples. This undecomposed plant matter likely contributes high  $\Delta G^{\circ}_{\text{Cox}}$   
538 compounds, such as lignin-like compounds, increasing the average  $\Delta G^{\circ}_{\text{Cox}}$  of the  
539 carbon pool.

540 We suggest that the higher organic acid concentrations observed in the  
541 middle of the spatial domain arise from the fermentation of labile organic  
542 compounds derived from deposited plant matter. If the most thermodynamically  
543 favorable compounds are preferentially fermented, this would further increase the  
544 average  $\Delta G^{\circ}_{\text{Cox}}$ . In sediments, a net accumulation of organic acids is observed when  
545 fermentation rates exceed respiration rates <sup>54</sup>, and acetate and C<sub>1</sub> compounds are  
546 the dominant organic products of anaerobic metabolism in northern wetlands and  
547 bogs <sup>55,56</sup>. These products of anaerobic metabolism may accumulate in permafrost  
548 through equivalent processes.

549

550 *Microbial community composition and environmental correlates*

551 Community composition across our study site shared similarities with  
552 permafrost communities reported previously from across the Arctic, suggesting a  
553 core permafrost microbiome may be selected for by shared environmental  
554 constraints across disparate locations. We observed high representation of  
555 Acidobacteria and Proteobacteria, consistent with permafrost communities  
556 reported from Sweden <sup>30</sup>, and parts of Alaska <sup>31</sup>, and high representation of  
557 Chloroflexi, which has recently been reported in other Alaskan permafrost samples  
558 <sup>28,31</sup>. Archaeal communities represented only a small percentage of the libraries and  
559 were dominated by taxa grouping to methanogens in the phylum Euryarchaeota,  
560 which is consistent with previous reports from across the Arctic <sup>28,30,31,57</sup>. In contrast  
561 with previous studies, we saw high representation of Verrucomicrobia, which are  
562 globally abundant in soils <sup>58</sup>, but have not been previously reported as dominant  
563 members of permafrost communities. Further comparisons of geographically  
564 distinct permafrost communities will require an increased number of studies  
565 employing well-replicated sampling designs and the adoption of standardized  
566 analytical techniques within the field <sup>7,10</sup>.

567 Permafrost communities across the study site were influenced by similar  
568 drivers to non-permafrost soil communities, however several relationships were  
569 indicative of the unique constraints of the permafrost environment. Diversity was  
570 best described by a positive linear relationship with pH, which is consistent with  
571 trends observed in non-permafrost soils <sup>11-13</sup>. The overall variation in community

572 composition showed a clear relationship with environmental variation (PCs),  
573 although the particular environmental variables influencing community variation  
574 were not clear from the RDA model selection. Despite a relatively broad range of pH  
575 values across samples, no strong relationship between pH and community  
576 composition was observed. The relative abundance of the dominant phyla also  
577 varied significantly with numerous environmental variables, however these  
578 relationships were atypical of trends observed in surveys of non-permafrost soils.  
579 For example, at the phylum level, Acidobacteria are typically negatively associated  
580 with pH, while Bacteroidetes and Actinobacteria typically have positive  
581 relationships with pH <sup>11</sup>; however, we observed the opposite trends for both  
582 Acidobacteria and Bacteroidetes and no trend for Actinobacteria with soil pH.  
583 Selective constraints of the permafrost environment may limit the phylogenetic  
584 breadth of these taxa, altering phylum level trends from those observed in other  
585 soils. Additionally, other deterministic factors, such as soil redox conditions and soil  
586 organic matter composition, which also showed strong univariate relationships with  
587 the relative abundance of particular taxa, may be more important drivers of  
588 community structure in permafrost-affected soils.

589

#### 590 *Ecological processes influencing community composition*

591 We employed a null modelling approach to evaluate the degree to which  
592 deterministic processes drive community variation and to resolve the variables  
593 most likely to be causally influencing composition. Patterns of community  
594 composition arise from a combination of deterministic and stochastic process <sup>59</sup> and



595 the relative importance of these processes vary between systems. Null modeling  
596 provides a valuable tool to disentangle the influence of individual processes on  
597 patterns of microbial distribution <sup>50,60</sup>. This approach has significant advantages  
598 over the RDA models, which cannot estimate relative contributions of assembly  
599 processes and did not reveal specific environmental variables that drive spatial  
600 variation in community composition.

601 Null modeling revealed a strong signal for dispersal limitation combined with  
602 a very weak signal for homogenizing dispersal, indicative of very restricted  
603 movement of microorganisms within the permafrost. The signal for dispersal  
604 limitation was stronger than for either homogenous or variable selection, and was  
605 effectively equivalent to the value for total selection. Dispersal limitation may be an  
606 especially important process in permafrost-affected soils, where microorganisms  
607 remain frozen in place for prolonged periods. Significant dispersal events may  
608 therefore be restricted to the limited movement that occurs through cryoturbation.  
609 These constraints likely limit community mixing over very short distances, which  
610 would lead to the strong signal of dispersal limitation observed in our null model  
611 analyses.

612 Given strong dispersal limitation, we expected that the spatial PCNM  
613 variables would explain significant variation in community composition,  
614 independent of environmental variation. This expectation was not met, however,  
615 with PCNM axes explaining little variation in the RDA model. The lack of a strong  
616 spatial signal in the RDA model indicates that the influence of spatial processes

617 manifest below the spatial resolution of our sampling, consistent with very  
618 restricted movement of microorganisms through permafrost.

619 We found 37 % of the total community variation in permafrost community  
620 composition was explained by selective processes, and that soil characteristics  
621 associated with Fe(II) content are likely the most important environmental  
622 variables deterministically influencing community composition. Soil Fe(II)  
623 accumulates in anaerobic soils through the reduction of Fe(III), and iron reduction  
624 can contribute substantially to respiration in Arctic soils <sup>61,62</sup>. A recent multi-omic  
625 analysis of Alaskan permafrost reported high representation of proteins annotated  
626 to iron-reducing taxa and the expression of genes annotated as cytochromes central  
627 to iron-reduction, suggesting iron-reducing taxa were likely active *in situ* <sup>31</sup>.  
628 Importantly, Fe(III) reduction competes with other anaerobic processes, and  
629 suppresses less thermodynamically favorable methanogenic pathways <sup>63</sup>. The  
630 relationship between Fe(II) and total selection indicates that soil redox conditions  
631 and thermodynamic constraints on microbial metabolism are likely to be the  
632 primary selection pressures that deterministically govern community composition.

633 These findings suggest that the stability of the permafrost environment  
634 strongly influences community structure and function, directly by restricting  
635 community mixing and indirectly by influencing the selective landscape, as electron  
636 donors and acceptors are depleted and infrequently replenished. This contrasts  
637 strongly with non-permafrost soils, in which communities are presumed to be well-  
638 dispersed through aeolian <sup>64</sup> and hydrologic process <sup>65</sup>, nutrient fluxes are dynamic  
639 <sup>66,67</sup>, and communities are thought to be shaped predominantly by selection <sup>68,69</sup>.

640 Permafrost community structure and function, therefore, appear to be uniquely  
641 influenced by a balance between dispersal limitation imposed by frozen soil and  
642 deterministic selection arising primarily from thermodynamic constraints.

643

#### 644 *Thermodynamic constraints*

645         The thermodynamic constraints driving selection arise from the composition  
646 of both the organic matter and terminal electron acceptor pools, as outlined in our  
647 final SEM. We suggest that total carbon content accrues in the form of less favorable  
648 organic matter, as stocks of more favorable organic compounds are depleted; in  
649 turn, a relationship emerges wherein soil carbon content increases with  $\Delta G^{\circ}_{Cox}$   
650 (higher values indicate lower favorability<sup>38</sup>). Further, organic acids are expected to  
651 accumulate in these soils through anaerobic metabolism, as labile carbon is  
652 fermented. We suggest that these organic acids support nitrate and Fe(III)  
653 reduction, such that organic acid content is negatively associated with nitrate, and  
654 positively associated with Fe(II). Additionally, a negative relationship between  
655 nitrate and Fe(II) likely arises because Fe(III) reduction is less energetically  
656 favorable than nitrate reduction. Modification indices supported a positive  
657 association between total soil carbon and nitrate content in the final model: the  
658 positive association between total carbon and nitrate is consistent with our  
659 interpretation of higher carbon content resulting from accumulation of organic  
660 molecules that are less thermodynamically favorable for microbially-driven organic  
661 carbon oxidation. In this case, higher total carbon reflects less favorable carbon,  
662 which would result in lower rates of nitrate reduction that depend on the oxidation

663 of organic carbon, and thus a positive carbon-nitrate relationship. We note that such  
664 inferences should be interpreted as speculative, given that controlled experiments  
665 were not conducted.

666

### 667 *Conclusions*

668 Our findings support the hypothesis that permafrost microbial communities  
669 are shaped by factors that are distinct from those governing non-permafrost soil  
670 communities. We found that microbial distributions in permafrost are driven  
671 primarily by dispersal limitation imposed by frozen soil and deterministic selection  
672 arising from thermodynamic constraints of the permafrost environment. This  
673 contrasts sharply with non-permafrost soil communities, which are driven primarily  
674 by soil pH<sup>11-13</sup>. These findings underscore the need for different mechanistic models  
675 predicting microbial community characteristics in permafrost and non-permafrost  
676 soils, given the different processes governing these systems. Our findings suggest  
677 that predictive models of permafrost community composition will need to account  
678 for organic carbon thermodynamics, organic acid concentrations, and redox  
679 conditions, which may be informed by knowledge of landscape history. However,  
680 efforts to accurately predict community composition at the landscape-scale based  
681 solely on environmental characteristics may be limited due to the strong influence  
682 of dispersal limitation.

683 Our findings additionally suggest that changes in permafrost microbial  
684 community structure and function are likely to be drastic in response to thaw, as  
685 hydrologic changes mobilize organisms and nutrients, thereby relieving the primary

686 constraints on communities. Community responses to change are also likely to be  
687 highly varied across landscapes, given the environmental and microbiological  
688 heterogeneity of permafrost-affected soils. Identifying how pre-thaw environmental  
689 and community characteristics influence post-thaw responses will be essential for  
690 accurately predicting ecosystem level responses to environmental change.  
691

## 692 **References**

- 693 1 Van Everdingen, R. O. *Multi-language Glossary of Permafrost and Related*  
694 *Ground-ice Terms in Chinese, English, French, German, Icelandic, Italian,*  
695 *Norwegian, Polish, Romanian, Russian, Spanish, and Swedish.* (International  
696 Permafrost Association, Terminology Working Group, 1998).
- 697 2 Burn, C. R. & Nelson, F. E. Comment on “A projection of severe near-surface  
698 permafrost degradation during the 21st century” by David M. Lawrence and  
699 Andrew G. Slater. *Geophysical Research Letters* **33**, L21503,  
700 doi:10.1029/2006GL027077 (2006).
- 701 3 Tarnocai, C. *et al.* Soil organic carbon pools in the northern circumpolar  
702 permafrost region. *Global Biogeochemical Cycles* **23**, GB2023,  
703 doi:10.1029/2008GB003327 (2009).
- 704 4 Zhang, T., Barry, R. G., Knowles, K., Heginbottom, J. A. & Brown, J. Statistics  
705 and characteristics of permafrost and ground-ice distribution in the Northern  
706 Hemisphere. *Polar Geography* **31**, 47-68, doi:10.1080/10889370802175895  
707 (2008).
- 708 5 Bockheim, J. G. Permafrost distribution in the southern circumpolar region  
709 and its relation to the environment: A review and recommendations for  
710 further research. *Permafrost and Periglacial Processes* **6**, 27-45,  
711 doi:10.1002/ppp.3430060105 (1995).
- 712 6 Ping, C. L., Jastrow, J. D., Jorgenson, M. T., Michaelson, G. J. & Shur, Y. L.  
713 Permafrost soils and carbon cycling. *Soil* **1**, 147-171, doi:10.5194/soil-1-147-  
714 2015 (2015).

- 715 7 Jansson, J. K. & Tas, N. The microbial ecology of permafrost. *Nature Reviews*  
716 *Microbiology* **12**, 414-425, doi:10.1038/nrmicro3262 (2014).
- 717 8 Schuur, E. A. G. *et al.* Vulnerability of Permafrost Carbon to Climate Change:  
718 Implications for the Global Carbon Cycle. *BioScience* **58**, 701-714,  
719 doi:10.1641/B580807 (2008).
- 720 9 Vaughan, D. G. *et al.* in *Climate Change 2013: The Physical Science Basis.*  
721 *Contribution of Working Group I to the Fifth Assessment Report of the*  
722 *Intergovernmental Panel on Climate Change* (eds T.F. Stocker *et al.*) Ch. 4,  
723 317-382 (Cambridge University Press, 2013).
- 724 10 Mackelprang, R., Saleska, S. R., Jacobsen, C. S., Jansson, J. K. & Taş, N.  
725 Permafrost Meta-Omics and Climate Change. *Annual Review of Earth and*  
726 *Planetary Sciences* **44**, 439-462 (2016).
- 727 11 Lauber, C. L., Hamady, M., Knight, R. & Fierer, N. Pyrosequencing-based  
728 assessment of soil pH as a predictor of soil bacterial community structure at  
729 the continental scale. *Applied and Environmental Microbiology* **75**, 5111-5120  
730 (2009).
- 731 12 Chu, H. *et al.* Soil bacterial diversity in the Arctic is not fundamentally  
732 different from that found in other biomes. *Environmental Microbiology* **12**,  
733 2998-3006 (2010).
- 734 13 Fierer, N. & Jackson, R. B. The diversity and biogeography of soil bacterial  
735 communities. *Proceedings of the National Academy of Sciences of the United*  
736 *States of America* **103**, 626-631 (2006).

- 737 14 Cleveland, C. C., Nemergut, D. R., Schmidt, S. K. & Townsend, A. R. Increases in  
738 soil respiration following labile carbon additions linked to rapid shifts in soil  
739 microbial community composition. *Biogeochemistry* **82**, 229-240,  
740 doi:10.1007/s10533-006-9065-z (2007).
- 741 15 Ramirez, K. S., Craine, J. M. & Fierer, N. Consistent effects of nitrogen  
742 amendments on soil microbial communities and processes across biomes.  
743 *Global Change Biology* **18**, 1918-1927 (2012).
- 744 16 Brockett, B. F., Prescott, C. E. & Grayston, S. J. Soil moisture is the major factor  
745 influencing microbial community structure and enzyme activities across  
746 seven biogeoclimatic zones in western Canada. *Soil Biology and Biochemistry*  
747 **44**, 9-20 (2012).
- 748 17 Cruz-Martínez, K. *et al.* Effect of rainfall-induced soil geochemistry dynamics  
749 on grassland soil microbial communities. *Applied and Environmental*  
750 *Microbiology* **78**, 7587-7595 (2012).
- 751 18 Zhao, C. *et al.* Soil microbial community composition and respiration along an  
752 experimental precipitation gradient in a semiarid steppe. *Scientific Reports* **6**,  
753 24317, doi:10.1038/srep24317 (2016).
- 754 19 Steven, B. *et al.* Characterization of the microbial diversity in a permafrost  
755 sample from the Canadian high Arctic using culture-dependent and culture-  
756 independent methods. *FEMS Microbiology Ecology* **59**, 513-523,  
757 doi:10.1111/j.1574-6941.2006.00247.x (2007).
- 758 20 Tuorto, S. J. *et al.* Bacterial genome replication at subzero temperatures in  
759 permafrost. *The ISME Journal* **8**, 139 (2014).



- 760 21 Trivedi, P., Anderson, I. C. & Singh, B. K. Microbial modulators of soil carbon  
761 storage: integrating genomic and metabolic knowledge for global prediction.  
762 *Trends in Microbiology* **21**, 641-651 (2013).
- 763 22 Wieder, W. R. *et al.* Explicitly representing soil microbial processes in Earth  
764 system models. *Global Biogeochemical Cycles* **29**, 1782-1800 (2015).
- 765 23 Coolen, M. J., van de Giessen, J., Zhu, E. Y. & Wuchter, C. Bioavailability of soil  
766 organic matter and microbial community dynamics upon permafrost thaw.  
767 *Environmental Microbiology* **13**, 2299-2314 (2011).
- 768 24 Ernakovich, J. G., Wallenstein, M. D. & Calderón, F. J. Chemical Indicators of  
769 Cryoturbation and Microbial Processing throughout an Alaskan Permafrost  
770 Soil Depth Profile. *Soil Science Society of America Journal* **79**, 783-793,  
771 doi:10.2136/sssaj2014.10.0420 (2015).
- 772 25 Lee, H., Schuur, E. A., Inglett, K. S., Lavoie, M. & Chanton, J. P. The rate of  
773 permafrost carbon release under aerobic and anaerobic conditions and its  
774 potential effects on climate. *Global Change Biology* **18**, 515-527 (2012).
- 775 26 Waldrop, M. P. *et al.* Molecular investigations into a globally important  
776 carbon pool: permafrost-protected carbon in Alaskan soils. *Global Change*  
777 *Biology* **16**, 2543-2554, doi:10.1111/j.1365-2486.2009.02141.x (2010).
- 778 27 Coolen, M. J. L. & Orsi, W. D. The transcriptional response of microbial  
779 communities in thawing Alaskan permafrost soils. *Frontiers in Microbiology*  
780 **6**, doi:10.3389/fmicb.2015.00197 (2015).

- 781 28 Mackelprang, R. *et al.* Metagenomic analysis of a permafrost microbial  
782 community reveals a rapid response to thaw. *Nature* **480**, 368-371,  
783 doi:10.1038/nature10576 (2011).
- 784 29 McCalley, C. *et al.* Methane dynamics regulated by microbial community  
785 response to permafrost thaw. *Nature* **514**, 478-481 (2014).
- 786 30 Mondav, R. *et al.* Discovery of a novel methanogen prevalent in thawing  
787 permafrost. *Nature Communications* **5**, 3212, doi:10.1038/ncomms4212  
788 (2014).
- 789 31 Hultman, J. *et al.* Multi-omics of permafrost, active layer and thermokarst bog  
790 soil microbiomes. *Nature* **521**, 208-212, doi:10.1038/nature14238 (2015).
- 791 32 Burrows, S. N. *et al.* Application of Geostatistics to Characterize Leaf Area  
792 Index (LAI) from Flux Tower to Landscape Scales Using a Cyclic Sampling  
793 Design. *Ecosystems* **5**, 0667-0679, doi:10.1007/s10021-002-0110-z (2002).
- 794 33 Stookey, L. L. Ferrozine---a new spectrophotometric reagent for iron.  
795 *Analytical Chemistry* **42**, 779-781 (1970).
- 796 34 Tfaily, M. M. *et al.* Advanced solvent based methods for molecular  
797 characterization of soil organic matter by high-resolution mass  
798 spectrometry. *Analytical Chemistry* **87**, 5206-5215 (2015).
- 799 35 Tfaily, M. M. *et al.* Sequential extraction protocol for organic matter from soils  
800 and sediments using high resolution mass spectrometry. *Analytica Chimica*  
801 *Acta* **972**, 54-61 (2017).

- 802 36 Kujawinski, E. B. & Behn, M. D. Automated analysis of electrospray ionization  
803 Fourier transform ion cyclotron resonance mass spectra of natural organic  
804 matter. *Analytical Chemistry* **78**, 4363-4373 (2006).
- 805 37 Minor, E. C., Steinbring, C. J., Longnecker, K. & Kujawinski, E. B.  
806 Characterization of dissolved organic matter in Lake Superior and its  
807 watershed using ultrahigh resolution mass spectrometry. *Organic*  
808 *Geochemistry* **43**, 1-11 (2012).
- 809 38 LaRowe, D. E. & Van Cappellen, P. Degradation of natural organic matter: a  
810 thermodynamic analysis. *Geochimica et Cosmochimica Acta* **75**, 2030-2042  
811 (2011).
- 812 39 Caporaso, J. G. *et al.* Ultra-high-throughput microbial community analysis on  
813 the Illumina HiSeq and MiSeq platforms. *The ISME Journal* **6**, 1621-1624  
814 (2012).
- 815 40 Aronesty, E. Comparison of sequencing utility programs. *The Open*  
816 *Bioinformatics Journal* **7**, 1-8 (2013).
- 817 41 BMAP: a fast, accurate, splice-aware aligner (2014).
- 818 42 Edgar, R. C. Search and clustering orders of magnitude faster than BLAST.  
819 *Bioinformatics* **26**, 2460-2461 (2010).
- 820 43 RStudio: Integrated Development for R (RStudio, Inc., Boston, MA, 2015).
- 821 44 Vegan: community ecology package v. R package version 2.4-3. (2017).
- 822 45 Hiemstra, P. H., Pebesma, E. J., Twenhöfel, C. J. W. & Heuvelink, G. B. M. Real-  
823 time automatic interpolation of ambient gamma dose rates from the Dutch

- 824 radioactivity monitoring network. *Computers & Geosciences* **35**, 1711-1721,  
825 doi:doi:10.1016/j.cageo.2008.10.011 (2009).
- 826 46 Borcard, D. & Legendre, P. All-scale spatial analysis of ecological data by  
827 means of principal coordinates of neighbour matrices. *Ecological Modelling*  
828 **153**, 51-68 (2002).
- 829 47 Borcard, D., Legendre, P., Avois-Jacquet, C. & Tuomisto, H. Dissecting the  
830 spatial structure of ecological data at multiple scales. *Ecology* **85**, 1826-1832,  
831 doi:10.1890/03-3111 (2004).
- 832 48 Borcard, D., Gillet, F. & Legendre, P. *Numerical Ecology with R*. (Springer-  
833 Verlag, 2011).
- 834 49 Dini-Andreote, F., Stegen, J. C., van Elsas, J. D. & Salles, J. F. Disentangling  
835 mechanisms that mediate the balance between stochastic and deterministic  
836 processes in microbial succession. *Proceedings of the National Academy of*  
837 *Sciences of the United States of America* **112**, E1326-E1332,  
838 doi:10.1073/pnas.1414261112 (2015).
- 839 50 Stegen, J. C., Lin, X., Fredrickson, J. K. & Konopka, A. E. Estimating and  
840 mapping ecological processes influencing microbial community assembly.  
841 *Frontiers in Microbiology* **6**, doi:10.3389/fmicb.2015.00370 (2015).
- 842 51 leaps: Regression Subset Selection (2017).
- 843 52 Structural Equation Models (2017).
- 844 53 Shur, Y., Hinkel, K. M. & Nelson, F. E. The transient layer: implications for  
845 geocryology and climate-change science. *Permafrost and Periglacial Processes*  
846 **16**, 5-17, doi:10.1002/ppp.518 (2005).

- 847 54 McMahon, P. B. & Chapelle, F. H. Microbial production of organic acids in  
848 aquitard sediments and its role in aquifer geochemistry. *Nature* **349**, 233-  
849 235 (1991).
- 850 55 Duddleston, K. N., Kinney, M. A., Kiene, R. P. & Hines, M. E. Anaerobic  
851 microbial biogeochemistry in a northern bog: Acetate as a dominant  
852 metabolic end product. *Global Biogeochemical Cycles* **16**, 11-11-11-19,  
853 doi:10.1029/2001GB001402 (2002).
- 854 56 Hines, M. E., Duddleston, K. N. & Kiene, R. P. Carbon flow to acetate and C1  
855 compounds in northern wetlands. *Geophysical Research Letters* **28**, 4251-  
856 4254, doi:10.1029/2001GL012901 (2001).
- 857 57 Tas, N. *et al.* Impact of fire on active layer and permafrost microbial  
858 communities and metagenomes in an upland Alaskan boreal forest. *The ISME*  
859 *Journal* **8**, 1904-1919, doi:10.1038/ismej.2014.36 (2014).
- 860 58 Bergmann, G. T. *et al.* The under-recognized dominance of Verrucomicrobia  
861 in soil bacterial communities. *Soil Biology & Biochemistry* **43**, 1450-1455,  
862 doi:10.1016/j.soilbio.2011.03.012 (2011).
- 863 59 Vellend, M. Conceptual Synthesis in Community Ecology. *The Quarterly*  
864 *Review of Biology* **85**, 183-206, doi:10.1086/652373 (2010).
- 865 60 Stegen, J. C. *et al.* Quantifying community assembly processes and identifying  
866 features that impose them. *The ISME Journal* **7**, 2069-2079,  
867 doi:10.1038/ismej.2013.93 (2013).
- 868 61 Lipson, D. A., Jha, M., Raab, T. K. & Oechel, W. C. Reduction of iron (III) and  
869 humic substances plays a major role in anaerobic respiration in an Arctic

- 870 peat soil. *Journal of Geophysical Research: Biogeosciences* **115**, G00I06,  
871 doi:10.1029/2009JG001147 (2010).
- 872 62 Lipson, D. A., Raab, T. K., Gorja, D. & Zlamal, J. The contribution of Fe(III) and  
873 humic acid reduction to ecosystem respiration in drained thaw lake basins of  
874 the Arctic Coastal Plain. *Global Biogeochemical Cycles* **27**, 399-409,  
875 doi:10.1002/gbc.20038 (2013).
- 876 63 Miller, K. E., Lai, C.-T., Friedman, E. S., Angenent, L. T. & Lipson, D. A. Methane  
877 suppression by iron and humic acids in soils of the Arctic Coastal Plain. *Soil*  
878 *Biology and Biochemistry* **83**, 176-183, doi:doi:10.1016/j.soilbio.2015.01.022  
879 (2015).
- 880 64 Barberán, A. *et al.* Continental-scale distributions of dust-associated bacteria  
881 and fungi. *Proceedings of the National Academy of Sciences of the United States*  
882 *of America* **112**, 5756-5761, doi:10.1073/pnas.1420815112 (2015).
- 883 65 Treves, D. S., Xia, B., Zhou, J. & Tiedje, J. M. A Two-Species Test of the  
884 Hypothesis That Spatial Isolation Influences Microbial Diversity in Soil.  
885 *Microbial Ecology* **45**, 20-28, doi:10.1007/s00248-002-1044-x (2003).
- 886 66 Austin, A. T. *et al.* Water pulses and biogeochemical cycles in arid and  
887 semiarid ecosystems. *Oecologia* **141**, 221-235, doi:10.1007/s00442-004-  
888 1519-1 (2004).
- 889 67 Park, J.-H. & Matzner, E. Controls on the release of dissolved organic carbon  
890 and nitrogen from a deciduous forest floor investigated by manipulations of  
891 aboveground litter inputs and water flux. *Biogeochemistry* **66**, 265-286,  
892 doi:10.1023/B:BI0G.0000005341.19412.7b (2003).

- 893 68 Fierer, N., Bradford, M. A. & Jackson, R. B. Toward an ecological classification  
894 of soil bacteria. *Ecology* **88**, 1354-1364, doi:10.1890/05-1839 (2007).
- 895 69 Hartmann, A., Schmid, M., Tuinen, D. v. & Berg, G. Plant-driven selection of  
896 microbes. *Plant and Soil* **321**, 235-257, doi:10.1007/s11104-008-9814-y  
897 (2009).
- 898
- 899

## 900 **Acknowledgments**

901 This research was supported by the Microbiomes in Transition Initiative at Pacific  
902 Northwest National Lab (PNNL), a multiprogram national laboratory operated by  
903 Battelle for the U.S. Department of Energy, and was conducted under the Laboratory  
904 Directed Research and Development Program at PNNL. A portion of this research  
905 was conducted using PNNL Institutional Computing resources and at the  
906 Environmental Molecular Sciences Laboratory (EMSL), a national scientific user  
907 facility in Richland, WA. We thank Caroline Anderson and Alex Crump for their  
908 assistance with sample collection and field work. We thank Tom Wietsma for  
909 conducting carbon and nitrogen analyses and Tom Resch for conducting metals and  
910 anion analyses.

911

## 912 **Author Contributions**

913 This work was conceived by EMB, JKJ, and JCS. EMB, DWK, EBR, and SJF completed  
914 sample processing and laboratory analyses. Processing of amplicon sequencing data  
915 was completed by JMB. MMT and RKC performed FTICR-MS analyses and data  
916 processing. Statistical analyses were completed by EMB, JCS, and LMB. EMB wrote  
917 the manuscript, with input from all co-authors.

918

## 919 **Competing Financial Interests**

920 The authors declare no competing financial interests.

921
